# Supplementary material
Source: PubMed Central journal article supplement (PMC3525784)
Supplement: NIHMS414347-supplement-01.pdf [file NIHMS414347-supplement-01.pdf]

**Supplementary Table 1** Patient and Tumor Characteristics

|                                        | Observation | Adjuvant Radiation | <i>P</i> Value |
|----------------------------------------|-------------|--------------------|----------------|
| Subjects                               | 211         | 214                |                |
| Mean age, years (sd)                   | 65.2 (6.5)  | 63.5 (6.6)         | .006           |
| Ethnicity, n (%)                       |             |                    | .50            |
| White                                  | 141 (66.8)  | 154 (72.0)         |                |
| Black                                  | 42 (19.9)   | 41 (19.2)          |                |
| Other                                  | 28 (13.3)   | 19 (8.9)           |                |
| Mean body mass index (sd)              | 28.5 (11.7) | 27.7 (4.7)         | .86            |
| missing, n (%)                         | 16 (7.6)    | 30 (14.0)          |                |
| Performance status, n (%)              |             |                    | .17            |
| 0                                      | 152 (72.0)  | 169 (79.0)         |                |
| 1                                      | 53 (25.1)   | 38 (17.8)          |                |
| 2                                      | 3 (1.4)     | 4 (1.9)            |                |
| missing                                | 3 (1.4)     | 3 (1.4)            |                |
| Charlson comorbidity index (%)         |             |                    | .25            |
| 0                                      | 168 (79.6)  | 181 (84.6)         |                |
| 1                                      | 33 (15.6)   | 21 (9.8)           |                |
| 2                                      | 6 (2.8)     | 9 (4.2)            |                |
| 3                                      | 4 (1.9)     | 2 (0.9)            |                |
| 4                                      | 0 (0.0)     | 1 (0.5)            |                |
| Extent of Disease                      |             |                    | .92            |
| Extracapsular extension or pos. margin | 143 (67.8)  | 143 (66.8)         |                |
| Seminal vesicle invasion               | 23 (10.9)   | 22 (10.3)          |                |
| Both                                   | 45 (21.3)   | 49 (23.0)          |                |
| Gleason score (%)                      | n=188       | n=190              | .17            |
| ≤6                                     | 103 (54.8)  | 117 (61.6)         |                |
| 7                                      | 55 (29.3)   | 53 (27.9)          |                |
| 8-10                                   | 30 (16.0)   | 20 (10.5)          |                |
| Missing                                | 23 (10.9)   | 24 (11.2)          |                |
| Prostate specific antigen (%)          | n=187       | n=191              | .14            |
| <0.2ng/ml                              | 93 (49.7)   | 86 (45.0)          |                |
| ≥0.2ng/ml                              | 94 (50.3)   | 105 (55.0)         |                |
| Missing                                | 24 (11.4)   | 23 (10.7)          |                |

sd = standard deviation.
